# Supplementary material
Source: PubMed Central journal article supplement (PMC3748949)
Supplement: NIHMS494862-supplement-1.pdf [file NIHMS494862-supplement-1.pdf]

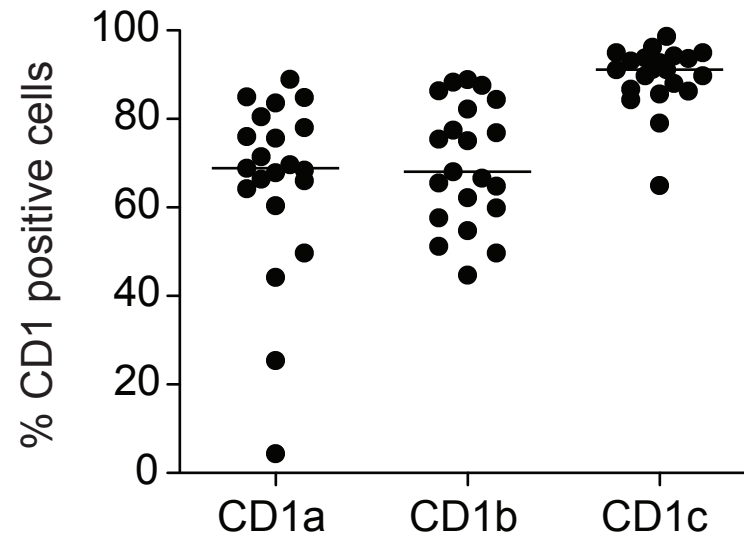

**Supplementary Figure 1.** CD1 expression on dendritic cells derived from twenty-one healthy blood donors. Data reflect the percentage of cells that stained above an isotype control antibody for CD1a, CD1b, and CD1c. These data were collected independently from that shown in Figure 1. Data are represented as % positive cells rather than MFI to adjust for temporal variation in flow cytometry calibration.
