# Supplementary material
Source: PubMed Central journal article supplement (PMC3748949)
Supplement: NIHMS494862-supplement-2.pdf [file NIHMS494862-supplement-2.pdf]

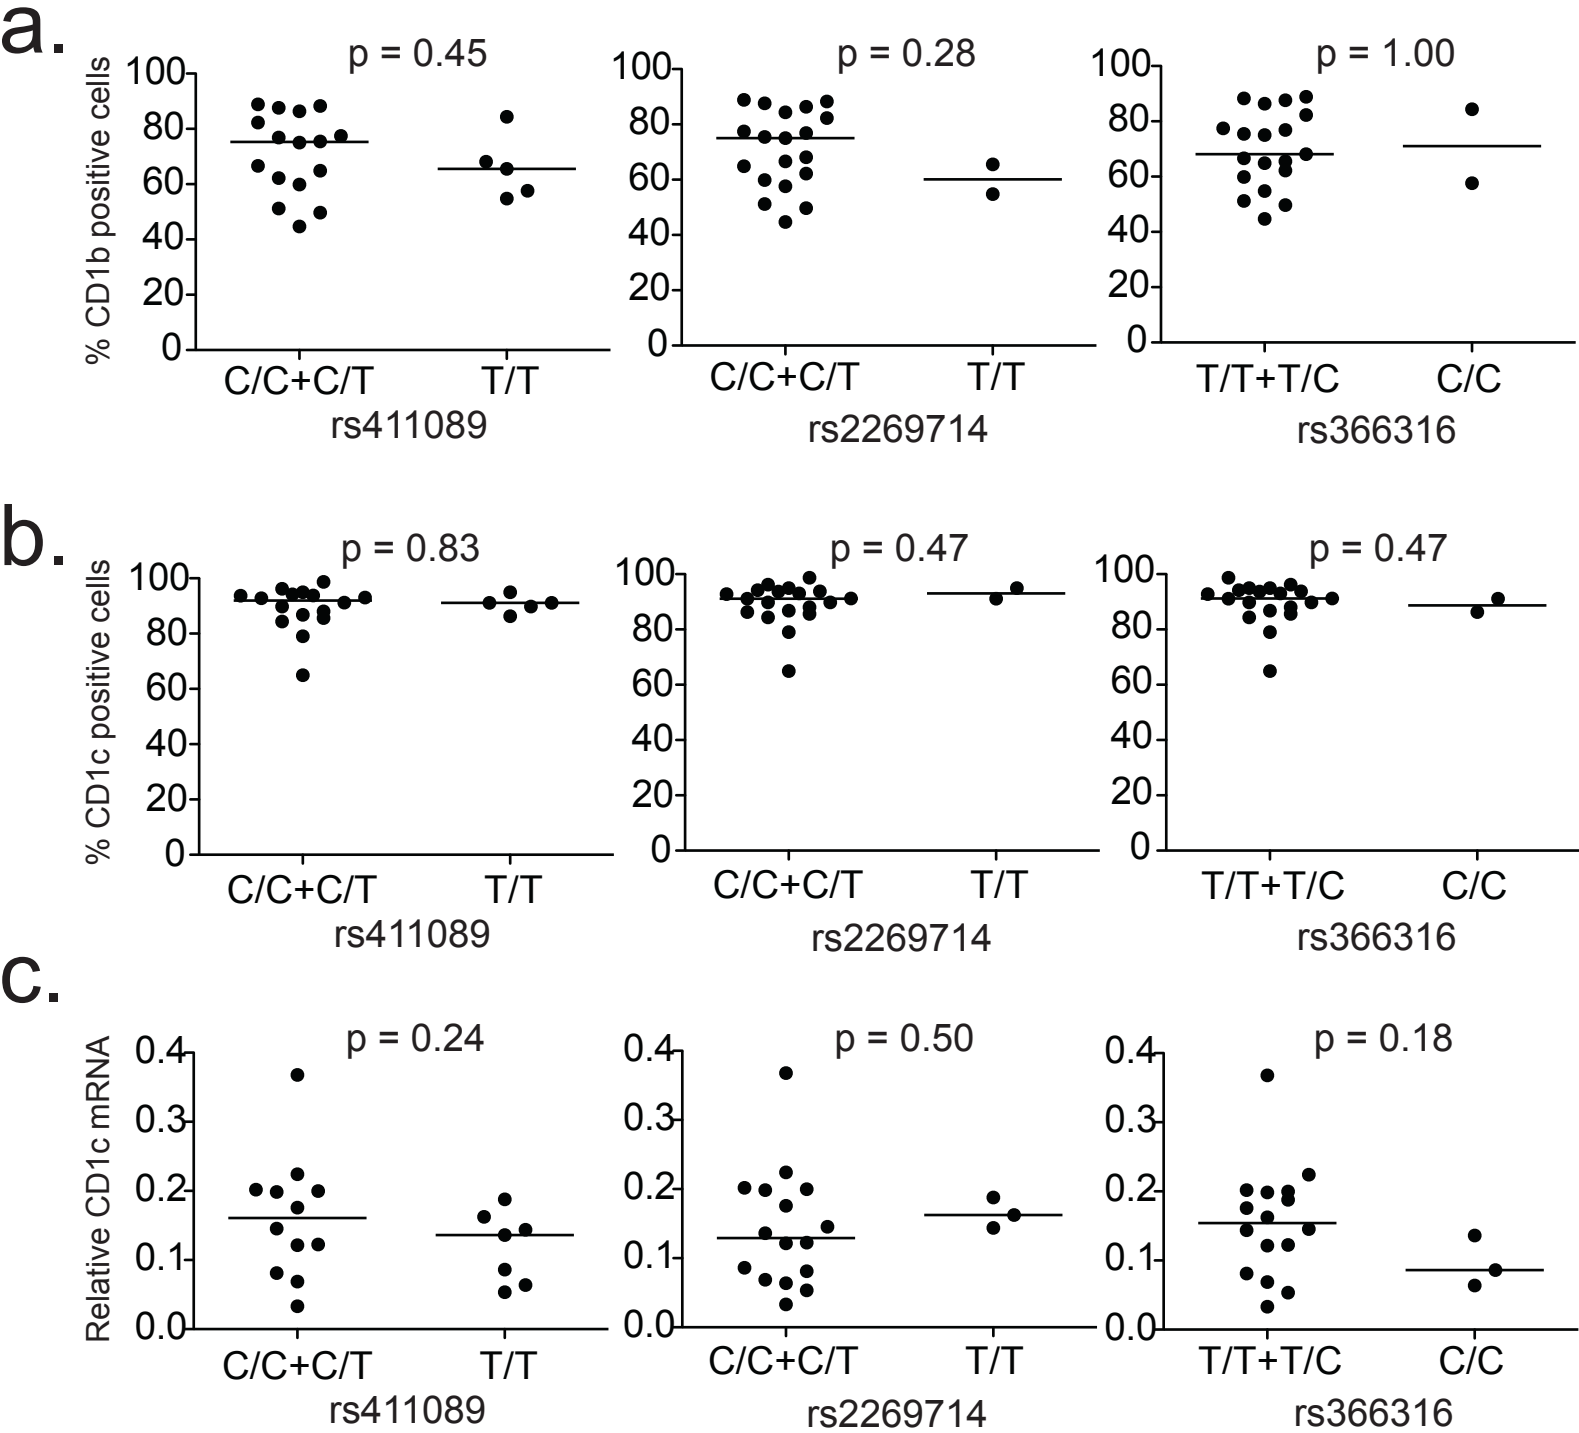

**Supplementary Figure 2.** Association between CD1b and CD1c expression levels and CD1A SNPs. Percentage of cells gated above isotype control staining stratified by SNPs for (a) CD1b and (b) CD1c. (c) CD1c mRNA levels were normalized to GAPDH and stratified by SNPs.
