# Supplementary material
Source: PubMed Central journal article supplement (PMC3748949)
Supplement: NIHMS494862-supplement-3.pdf [file NIHMS494862-supplement-3.pdf]

**a.**

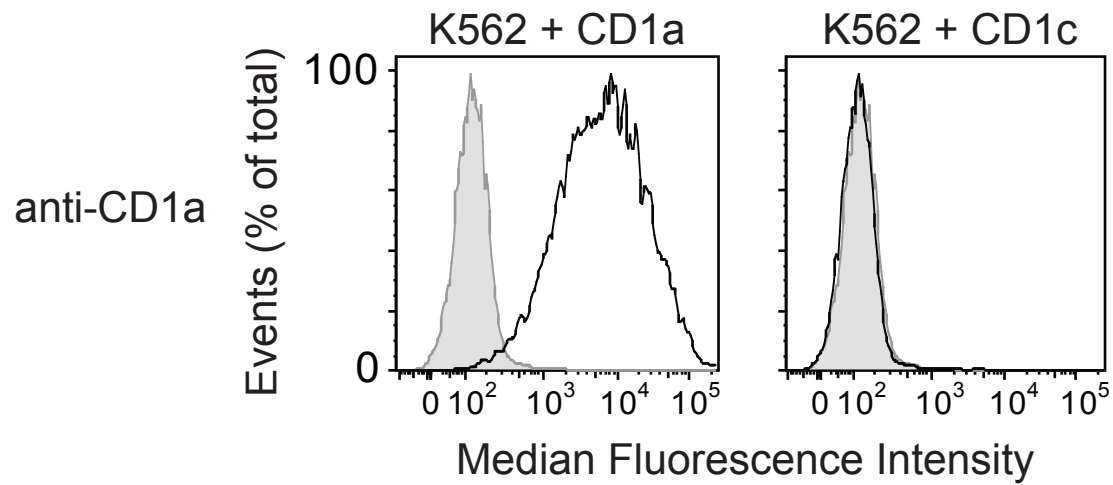

**b.**

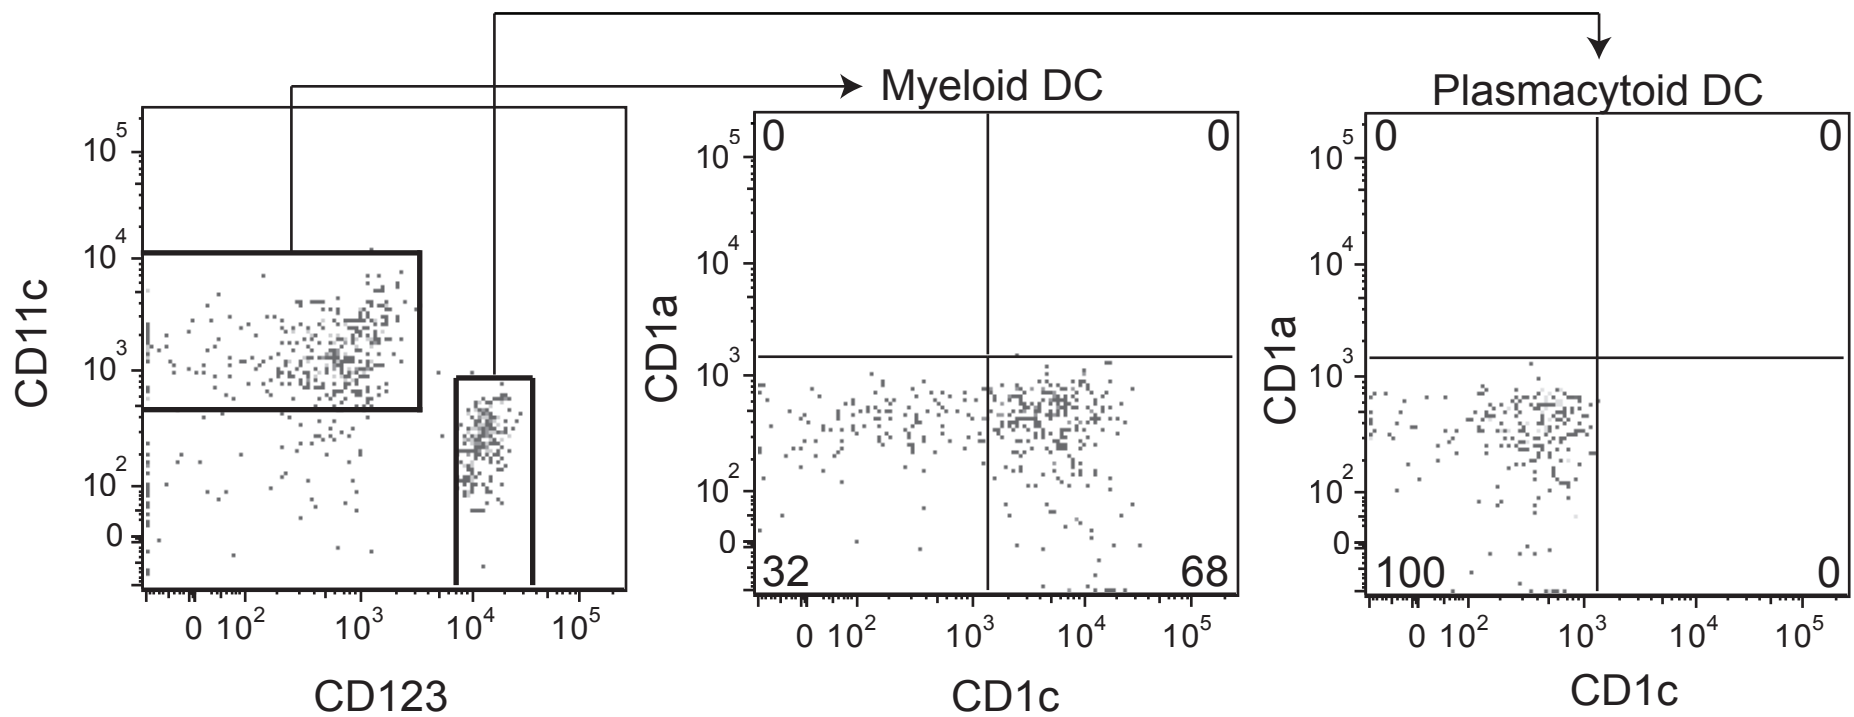

**Supplemental Figure 3.** Peripheral blood dendritic cells do not endogenously express CD1a. (a) Validation of CD1a staining antibody (clone HI149, dark line) using K562 cells transfected with either CD1a or CD1c. Shaded histograms indicate isotype control antibody staining. (b) Both myeloid (CD11c+CD123-) and plasmacytoid (CD11c-CD123+) dendritic cells were analyzed for the presence of CD1a and CD1c.
